# Supplementary material for: A fluorescence “off–on–off” sensing platform based on bimetallic gold/silver nanoclusters for ascorbate oxidase activity monitoring
Source: Royal Society of Chemistry journal article supplement (doi:10.1039/c9an02108f), 2019-11-29
Supplement: c9an02108f1.pdf [file c9an02108f1.pdf]

## Supporting Information

### **A Fluorescence “off-on-off” sensing platform based on bimetallic gold/silver nanoclusters for ascorbate oxidase activity monitoring**

Mengjun Wang, Mengke Wang, Guannan Wang<sup>\*b</sup>, Xingguang Su<sup>\*a</sup>

<sup>a</sup> *College of Chemistry, Jilin University, Changchun, 130012, PR China*

<sup>b</sup> *College of Medical Engineering, Jining Medical University, Jining, 272067, PR China*

\*Corresponding author

*Tel.:* +86-431-85168352

*E-mail address:* [chemwangguannan@gmail.com](mailto:chemwangguannan@gmail.com) (G. Wang), [suxg@jlu.edu.cn](mailto:suxg@jlu.edu.cn) (X. Su).

## Reagents

Reduced L-glutathione (GSH), trypsin (Try), hyaluronidase (HAase), bovine serum albumin (BSA), hemoglobin (Hb), urease (Urea), lysozyme (Lys) and Human serum albumin (HSA) AgNO<sub>3</sub> were ordered from Sangon Biotech (Shanghai) Co. Ltd. NaH<sub>2</sub>PO<sub>4</sub>, Na<sub>2</sub>HPO<sub>4</sub> and pepsin (pep) were obtained from Sino-pharm Co. (Shanghai, China). Phosphate buffer saline (PBS, 100 mmol L<sup>-1</sup>) were prepared with different volume ratio of 100 mmol L<sup>-1</sup> NaH<sub>2</sub>PO<sub>4</sub> and 100 mmol L<sup>-1</sup> Na<sub>2</sub>HPO<sub>4</sub>. Protamine (pro) was purchased from Shanghai Aladdin biochemical Co. Ltd. HAuCl<sub>4</sub> was ordered from Acros Organics. Ascorbic acid and hydrogen peroxide (H<sub>2</sub>O<sub>2</sub>) were obtained from Beijing Dingguo Biotechnology Co. Ltd. Ultrapure water with good resistivity ( $\rho \geq 18 \text{ M}\Omega \text{ cm}^{-1}$ ) throughout this experiment was used. The pH values were recorded by PHS-3C (Hangzhou, China). All chemicals are obtained from formal chemical suppliers and can be used directly without any further purification.

## Instruments

The ultraviolet-visible (UV-vis) absorption spectra, Photoluminescence (PL) spectra and Fourier transform infrared (FT-IR) spectra were obtained by a Varian GBC Cintra 10e UV-vis Spectrophotometer (Shimadzu Co., Ltd. Japan), RF-5301 fluorescence spectrophotometer and Thermo Nicolet 360 FTIR spectrometer, respectively. Transmission electron microscope (TEM) was carried on JEM-2100F. Fluorescence quantum yield and Fluorescence lifetime data were obtained on Edinburgh FLS920.

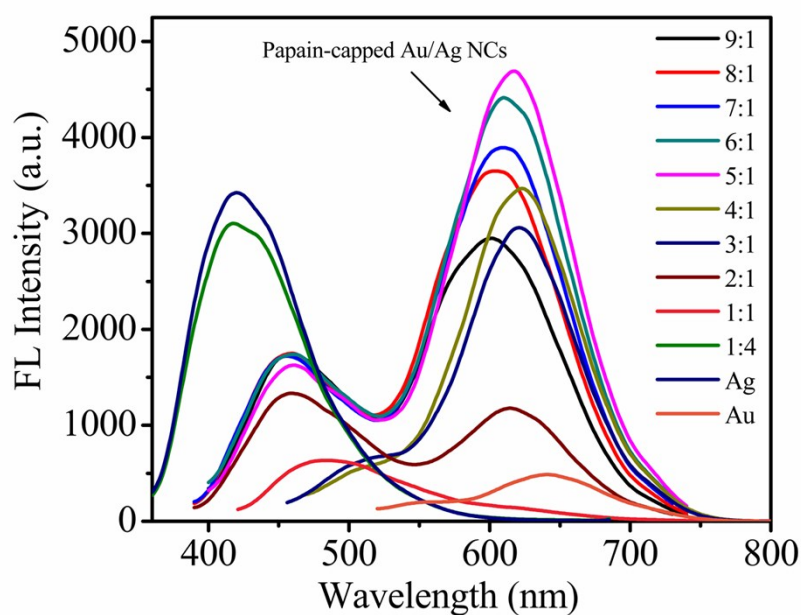

**Fig. S1** The fluorescence spectra of papain-capped Au/Ag NCs with different molar ratio of gold and silver.

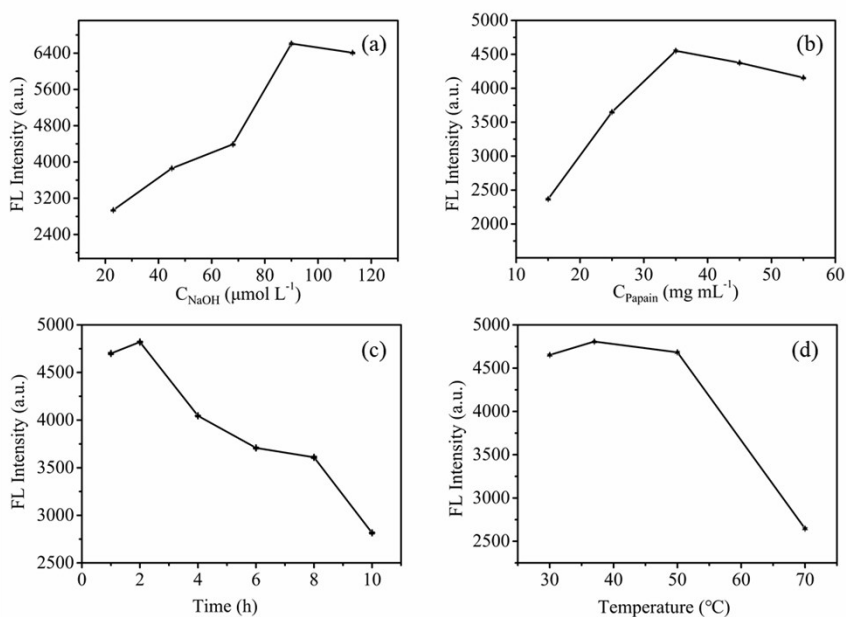

**Fig. S2** Optimal conditions for preparing papain-protected Au/Ag NCs. Effect of NaOH concentration (a), the concentration of papain (b), reaction time (c) and reaction temperature (d) on the FL intensity of papain-protected Au/Ag NCs.

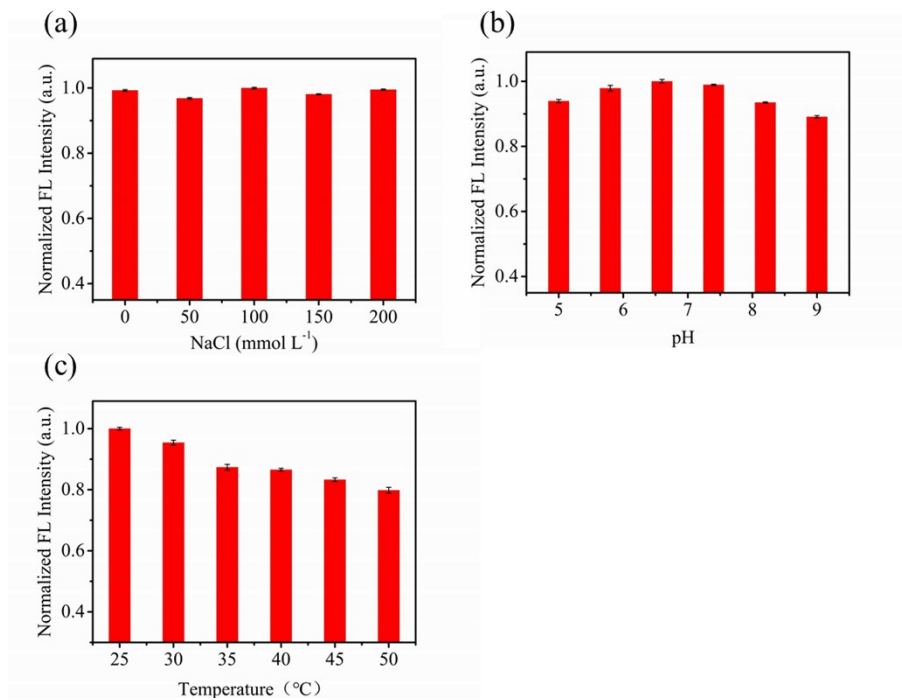

**Fig. S3** The effect of NaCl concentration (a), pH (b), and temperature (c) on the Normalized FL intensity of papain-capped Au/Ag NCs.

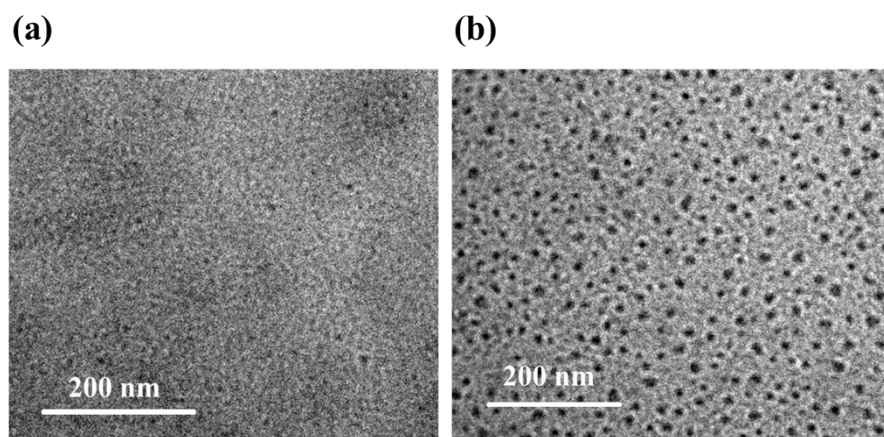

**Fig. S4** TEM images of papain-protected Au NCs (a) and papain-protected Au/Ag NCs

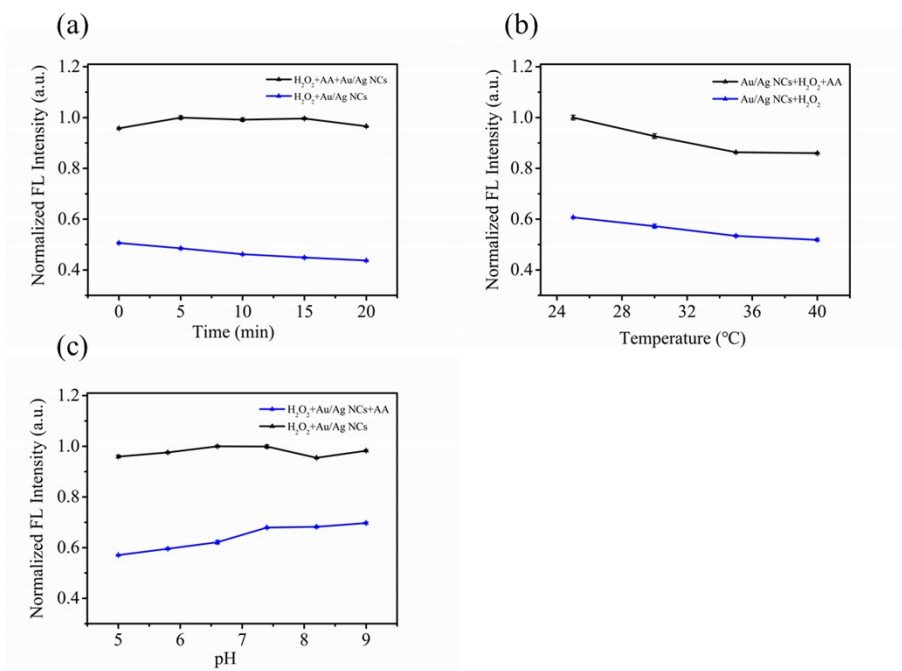

**Fig. S5** Effect of reaction time (a), temperature (b) and pH (c) on the fluorescence intensity of papain-capped Au/Ag NCs/H<sub>2</sub>O<sub>2</sub> system in the presence and absence of AA.

**Table S1** Comparison of our method with other methods for the determination of AAO

| Detection mode                                 | Material                | Linear range<br>(mU mL <sup>-1</sup> ) | LOD<br>(mU mL <sup>-1</sup> ) | References |
|------------------------------------------------|-------------------------|----------------------------------------|-------------------------------|------------|
| Ratiometric<br>fluorescent<br>and colorimetric | C-dots/ oxOPD           | 0.04–5<br>0.04–8                       | 0.017<br>0.012                | [1]        |
| Fluorometric<br>and colorimetric               | DNA-Au/Ag NCs           | 10–200                                 | 4.8                           | [2]        |
| Fluorescence                                   | Mn@ZnGe NPs             | 1250–2500                              | 728                           | [3]        |
| Fluorescence                                   | Papain-capped Au/Ag NCs | 5-80                                   | 1.72                          | This work  |

## Reference

1. Y. Wang, Y. Yang, W. Liu, F. Ding, P. Zou, X. Wang, Q. Zhao and H. Rao, *Mikrochim Acta*, 2019, **186**, 246.
2. S. Liu and S. Pang, *Mikrochim Acta*, 2018, **185**, 426.
3. X. Y. Han, Z. H. Chen, Q. X. Fan, K. N. Li, F. Y. Mu, Q. Luo, Z. Jin, G. Shi and M. Zhang, *Mikrochim Acta*, 2019, **186**, 466.
